# Supplementary material for: Trends in malaria prevalence and risk factors associated with the disease in Nkongho-mbeng; a typical rural setting in the equatorial rainforest of the South West Region of Cameroon
Source: PubMed Central journal article supplement (PMC8130964; doi:10.1371/journal.pone.0251380), 2021-05-18
Supplement: pone.0251380.s001.pdf [file pone.0251380.s001.pdf]

## QUESTIONNAIRE

Code.....

Date.....

### The Burden of Malaria in Nkongho-Mbeng and Risk Factors Associated With the Disease

#### Section one: Demography

1. Age.....
2. **Gender:** (1) Male  (2) Female
3. **Marital status:** (1) Married  (2) Single  (3) Widow  (4) Widower
4. **Village:** (1) Dinte  (2) Mbeta  (3) Lekwe
5. **Occupation:** (1) Farmer  (2) Teacher  (3) Health worker  (4) Business   
(5) Others  (specify.....)
6. **Educational level:** (1) Never been to school  (2) Primary school  (3) Secondary school  (4) High school  (5) University and above

#### Laboratory analysis

- 1). Microscopy: (1) positive  (2) negative
- 2). Parasite load.....

#### Section Two: Social Status

1. House type: (1) Mud block  (2) Cement block  (3) Others  (specify.....)
2. Number of people in the household: .....
3. Is there a ceiling?: (1) Yes  (2) No
4. If yes, type of ceiling: (1) Plywood  (2) Zinc  (3) Bamboo  (4) others   
(specify.....)
5. Do windows have mosquito nets?: (1) Yes  (2) No
6. Is there space at the gable ends of the wall: (1) Yes  (2) No

7. Type, type of toilet: (1) Pit latrine  (2) Water system  (3) Others  (specify  
.....)
8. Do you often stay out of your home late into the nights: (1) Yes  (2) No
9. What is your monthly income level: .....

### Section three: Malaria Management

1. **Have you ever had malaria:** (1) Yes  (2) No
2. **If yes, when did you last have malaria:** (1) This month  (2) Five month ago   
(3) One year ago
3. **(a) Where do you take treatment for malaria:** (1) Health center  (2) Drug store   
(3) Herbalist  (4) Automedication  (5) Others  (specify.....)
- (b) Which drug did you use:** (1) Athermeter  (2) Quinine  (3) Don't know   
(4) Others  (specify.....)

### Section four: Vector control

1. Is there standing water within 20 meters around the house: (1) Yes  (2) No
2. Are there bushes around the house: (1) Yes  (2) No
3. Are there crops around the house: (1) Yes  (2) No
4. If yes, what type: (1) Plantain  (2) Cocoa  (3) Coffee  (4) Cocoyam   
(5) Others  (specify.....)
5. Do you have a mosquito net?: (1) Yes  (2) No
6. If yes, how frequent do you use it: (1) everyday  (2) Some days  (3) Don't use
7. What is the state of the net: (1) Old  (2) Fairly use  (3) New
8. Dose the net have holes: (1) Yes  (2) No
9. Have you ever seen a dead insect on your net: (1) Yes  (2) No

10. Have you ever seen a dead mosquito on your net: (1) Yes  (2) No
11. Where did you obtain the net: (1) Market  (2) Health center  (3) Campaign
12. When did you obtain the net: (1) A month ago  (2) 6 months ago  (3) 1 year ago   
(4) Others  (specify.....)
13. Do you use insecticide mosquito spray: (1) Yes  (2) No
14. If yes, how frequent do you use it: (1) everyday  (2) Some days  (3) Don't use
15. Where do you carry your drinking water: (1) Spring  (2) Stream  (3) River   
 (4) Others  (specify.....)
16. How do you store water in the house: (1) Open containers  (2) Close containers   
 (3) Others  (specify.....)

**Thank you for your time**
